# Supplementary material
Source: publisher site journal article supplement (https://www.degruyterbrill.com/publication/isbn/9783486593136/downloadAsset/9783486593136_Leseprobe.pdf)
Supplement: Supplementary file 1 [file 9783486593136_Leseprobe.pdf]

## 4.4 Internationalisierungsprozess

*In diesem Abschnitt lernen Sie*

- das Spektrum internationaler Aktivitäten,
- organisatorische und geografische Internationalisierungsstufen,
- die Incoterms,
- mögliche Internationalisierungspfade und
- drei Grundmuster der Internationalisierung kennen.

Wie schon dargelegt erfolgt die Internationalisierung eines Unternehmens nicht auf einen Schlag sondern i.d.R. schrittweise, meist sogar in relativ kleinen Schritten. Am Anfang aller Internationalisierung steht selbstverständlich immer die Entscheidung, ob man sich grundsätzlich auf internationale Aktivitäten einlassen will oder nicht. Manchmal fängt eine Internationalisierung allerdings auch schleichend an, insbesondere wenn zunächst nur reaktiv gehandelt wird. Gerade mittelständische Unternehmen finden sich dann unversehens ohne eine strategische Entscheidung in einem Internationalisierungsprozess wieder. Unternehmen, die als Zulieferer wichtige Kunden haben, folgen diesen häufig auch in internationale Märkte.

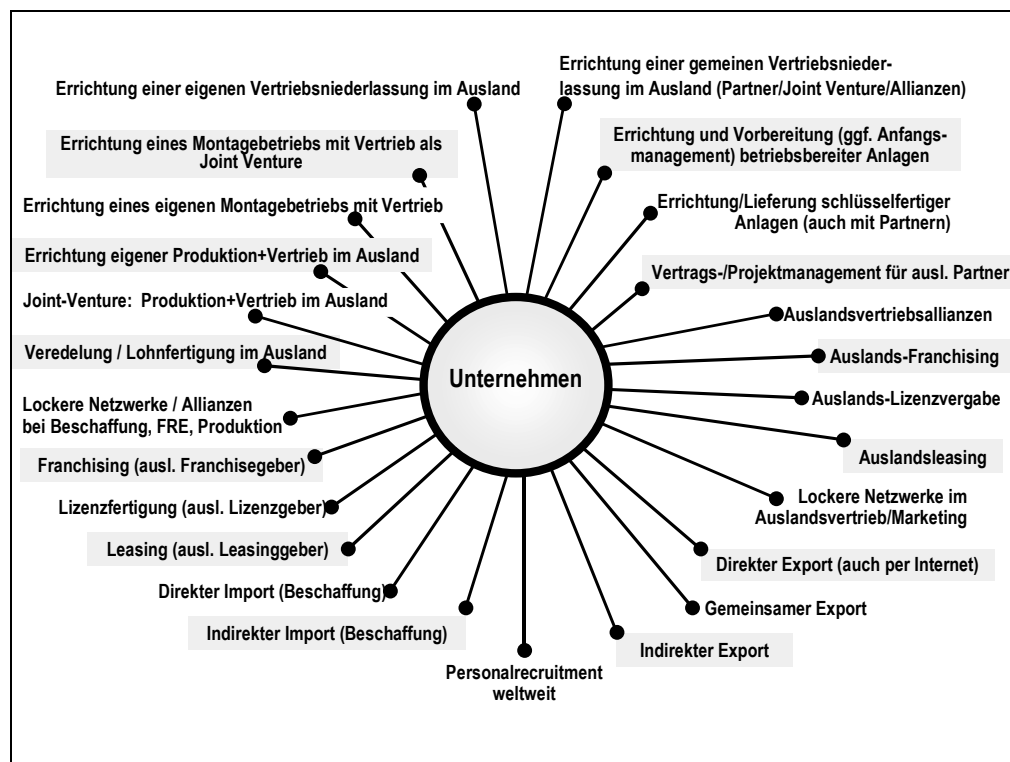

Abb. 4-10: Spektrum der Internationalisierungsaktivitäten von Unternehmen

Abgesehen von einer eher zufälligen reaktiven Internationalisierung ist dann eine Entscheidung über die interessanten Märkte/Länder und danach auch über die Art der internationalen Aktivität in den jeweiligen Ländern zu treffen (vergl. Abbildung 4-10). Es sind dabei solche Länder auszuwählen, die am besten dem Internationalisierungsmotiv des Unternehmens (Markterweiterung, Beschaffungsoptimierung, Standortvorteile...) entsprechen. Auf die Instrumente zur Marktauswahl wird in Kapitel 7 näher eingegangen.

Der Internationalisierungsprozess eines Unternehmens erstreckt sich meist über einen längeren Zeitraum, in dem sukzessive höhere Internationalisierungsstufen erklommen werden (vergl. Abbildung 4-11). Es wird häufig von Stufen gesprochen, obwohl nicht wie bei einer Treppe eine Stufe nach der anderen beschritten werden muss. Die gewählten Strategien und Marktbearbeitungsformen unterscheiden sich je nach Größe, Tätigkeitsfeld und Heimatland eines Unternehmens. Insbesondere von Dienstleistungsunternehmen sind sowohl der Grad der Intangibilität als auch die Interaktionsintensität zu beachten. Wichtig sind ebenfalls die örtliche Gebundenheit sowie kulturelle und Skaleneffekte.

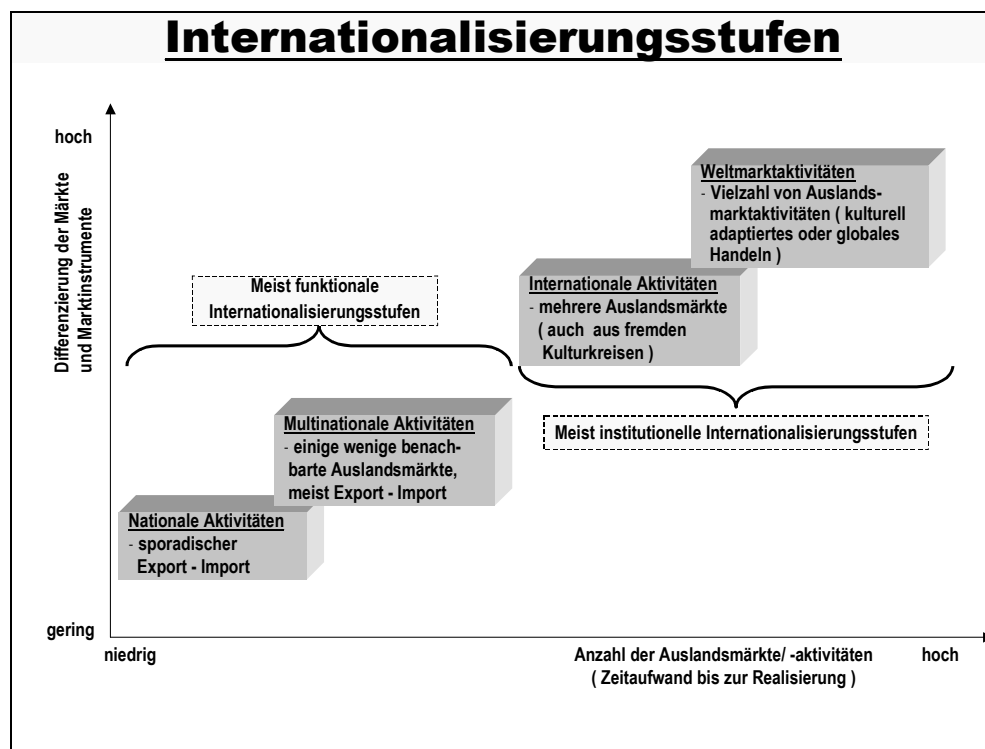

Abb. 4-11: Stufen eines Internationalisierungsprozesses

Je nach dem, ob es sich um den Internationalisierungsprozess eines Dienstleistungs- oder eines Produktionsunternehmens handelt, werden sinnvollerweise unterschiedliche Internationalisierungsarten und -formen auszuwählen sein. Die erste Art der Internationalisierung eines produzierenden Unternehmens ist meist der (reaktive) Export (auch bei Dienstleistungen wie Software, Videos, Musik...), meist noch unter Zuhilfenahme eines Mittlers oder ggf. auch der Import. Viele Dienstleistungen sind nicht exportfähig, also steht bei ihnen oft eine Kooperation, ein Franchising oder eine Lizenzierung am Anfang internationaler Aktivitäten (z.B. Hotels, Fastfood...). Banken oder Versicherungen wählen vielleicht zunächst die Form der Niederlassung und internationale tätige Bauunternehmen wählen ggf. Projektorganisationen im Ausland. In Abbildung 4-12 findet sich die Darstellung einer Abstufung internationaler Aktivitäten nach der Höhe der Kapital- und Managementleistungen in Heimat- und Gastland.

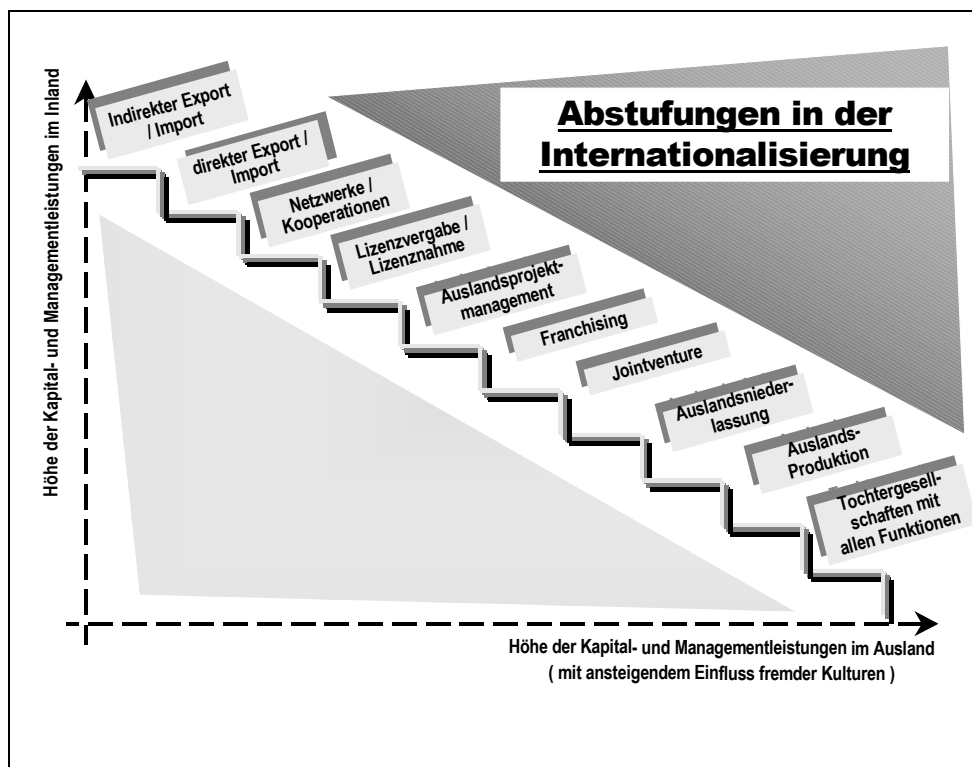

Abb. 4-12: Internationalisierungsabstufungen nach Kapital- und Managementleistungen

Je höher der Grad der Kapital- und/oder Managementleistungen in einem Gastland, desto höher wird auch der fremde Einfluss auf das Heimatlandunternehmen sein.

Damit werden auch Risiken ansteigen, gegen die es sich abzusichern gilt. Zum einen kann dies in Form einer Schaffung notwendiger unternehmensinterner Voraussetzungen (s. Abschnitt 4.3.) erfolgen, zum anderen gibt es Instrumentarien, die Risiken mindern oder ausschließen. Unternehmen, die in größerem Umfang über internationale Aktivitäten verfügen, werden nicht umhin kommen, ein wirksames Risikomanagement zu installieren.

Um das Risiko bei den ersten Internationalisierungsschritten so gering wie möglich zu halten, werden erste Auslandsgeschäfte z.B. oft in der Heimatwährung abgewickelt. So lassen sich das Wechselkurs-Transaktionsrisiko (zum Nachteil des eigenen Unternehmens), das Umrechnungs-/Translationsrisiko (historischer vs. Stichtagswechsellkurs) und das ökonomische Wechselkursrisiko vermeiden, denn gerade die ökonomischen Risiken wie z.B. Wettbewerbsverzerrungen oder Wachstums Hindernisse lassen sich meist auch nicht dauerhaft ausschalten. Ein Wechselkursrisiko lässt sich durch entsprechende Warentermingeschäfte zu bestimmten Kosten vermeiden. Kurssicherungsklauseln, Parallelfinanzierung im Gastland, Factoring bzw. Forfaitierung und staatliche Absicherungen sind andere Wege, um diese Risiken abzudecken.

Auch internationale Kontrakte bergen Risiken, gegen die man sich durch Factoring und Forfaitierung absichern kann. Zu diesen Risiken zählen Zahlungsverzug oder sogar Zahlungsausfall, gegen die es unter bestimmten Bedingungen auch Versicherungen (z.B. Exportkreditversicherungen) gibt. Diese Risiken entstehen durch geringe Kenntnisse, (noch) nicht vorhandenes Vertrauen, Transportfähnisse oder unterschiedliche Usancen/ Rechtssysteme und Kulturen. Gerade bei beginnenden internationalen Lieferungen ist es daher sehr hilfreich, sich auf das UN-Vertragsrecht oder die von der Internationalen Handelskammer in Paris (seit 1936) herausgegebenen und weltweit anerkannten „INCOTERMS“ (International Commercial Terms) zu beziehen. Darin wird die Verteilung der Transport-, Verlade-, und Versicherungskosten sowie den Gefahrenübergang zwischen Lieferant und Kunden in vier Gruppen (mit z.Zt. 13 Klauseln) geregelt.

Die neueste Fassung der Incoterms datiert aus dem Jahr 2000 und regelt (meist ausgehend von einem notwendigen Schiffstransport) folgende Tatbestände:

|                                 |                                            |
|---------------------------------|--------------------------------------------|
| ex works                        | Verkaufspreis ab Werk                      |
| free carrier (fca, fot, for...) | + Transportkosten + Versand zum Abgangsort |
| freight or carriage paid to     | + Transport- und Verladekosten bis ...     |
| free alongside ship (fas)       | + Umschlag-, Transport-, Abladekosten      |
| free on board (fob)             | + Lagerkosten und Ausfuhrgebühren          |
| cost plus freight (cfr)         | + Seefracht zum Bestimmungshafen           |
| cost insurance freight (cif)    | + (Mindest-)Seetransportversicherung       |
| delivered ex ship (des)         | + höhere Versicherung                      |

|                           |                                          |
|---------------------------|------------------------------------------|
| delivered ex quai (deq)   | + Umschlagskosten u. Einfuhrabfertigung  |
| delivered duty paid (ddp) | + Einfuhrzoll u. Transportkosten zum Ort |

Daneben gibt es Varianten, wie „cfr landed“, „cif verzollt“ oder „ddu“ in den Incoterms 2000; länderspezifische Abweichungen oder Sonderregelungen können abweichende Vereinbarungen notwendig machen. Je mehr Erfahrung und Vertrauen zwischen den Partnern vorhanden ist, desto leichter lassen sich abweichende Vereinbarungen treffen.

Auch hinsichtlich der Zahlungsbedingungen werden zu Beginn einer Lieferbeziehung meistens Sicherungen eingebaut, am leichtesten durch Vereinbarung von Vorkasse (selten üblich). Sicherheiten bieten z.B. ein Dokumenteninkasso (Zahlung gegen Dokumente über Banken), ein Dokumentenakkreditiv (zusätzlich vorab Zahlungszusage der ausländischen Bank) oder eine Patronatserklärung. Für diese Zahlungsarten hat die Internationale Handelskammer ebenfalls Richtlinien erarbeitet (ERI, ERA). Im Rahmen einer längeren vertrauensvollen internationalen Zusammenarbeit werden die Partner meist auf diese zusätzliche Kosten verursachenden Instrumente verzichten.

Der Internationalisierungsprozess ist nicht immer ein stetiger geradliniger Prozess. Nicht selten lernen Unternehmen erst aus ihren ersten Internationalisierungsschritten für die folgenden und sind somit gelegentlich gezwungen, Schritte rückgängig zu machen und neue Wege zu beschreiten. Erfolgreiche Markterschließungsprozesse eines Landes lassen sich nicht immer auf ein anderes Land übertragen. Mögliche Internationalisierungspfade sind in Abbildung 4-13 dargestellt.

Bei einer Internationalisierung der Wertschöpfungskette eines Unternehmens könnten sich unterschiedliche Entwicklungsalternativen ergeben, beispielhaft ist in Abbildung 4-14 eine mögliche Stufenabfolge sowohl für den internationalen Beschaffungs- als auch den internationalen Absatzmarkt dargestellt. Differenzierte Abfolgen sind denkbar und möglich.

Der Prozess der Internationalisierung hat aber auch noch eine organisatorisch-geografische Komponente. Sich aufs internationale Parkett begebende Unternehmen stehen immer wieder vor der Frage, in welcher Reihenfolge oder in welchen Zusammenhängen sich die internationalen Märkte am sinnvollsten bzw. effektivsten erschließen lassen. Dabei haben sich drei wesentliche Grundmuster als erfolgversprechend herausgestellt. Zum einen die sog. Wasserfallerschließung (vergl. Abbildung 4-15), zum zweiten die sog. Sprinklererschließung (vergl. Abbildung 4-16) und zum dritten die Wassertropfen-Erschließung.

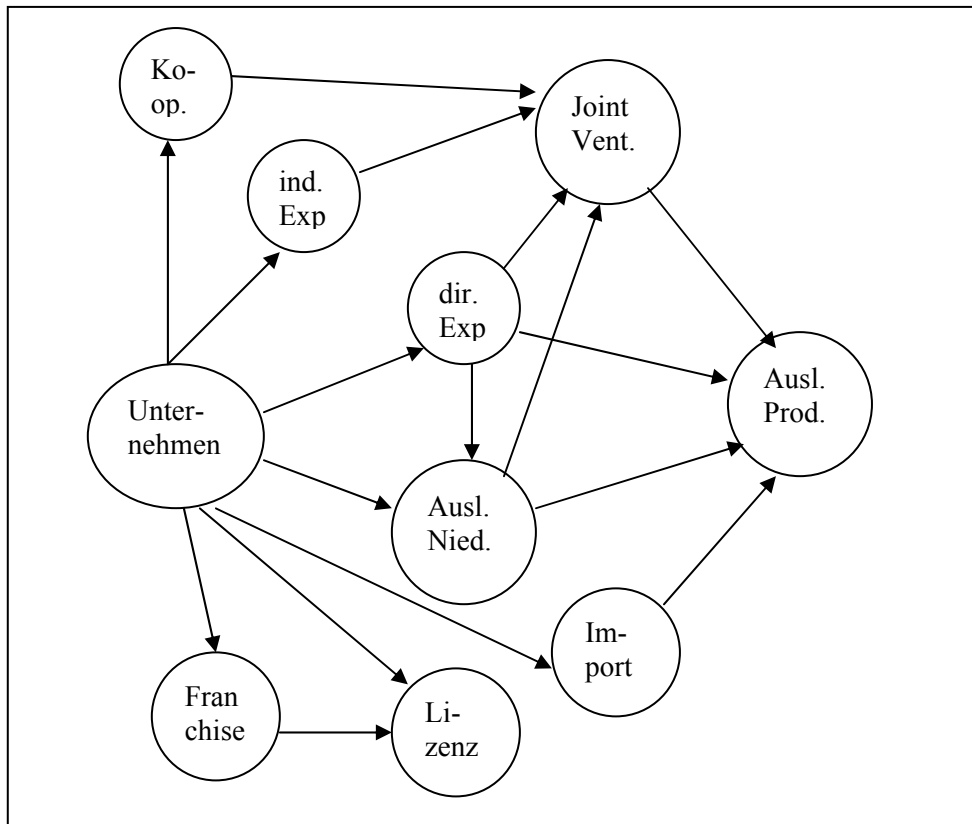

Abb. 4-13: Internationalisierungspfade in verschiedenen Ländern

| Internationalisierungsstufen | Absatzmärkte           | Beschaffungsmärkte       |
|------------------------------|------------------------|--------------------------|
| Stufe 1                      | Export, E-Commerce     | nationale Beschaffung    |
| Stufe 2                      | Vertriebsniederlassung | E-Procurement            |
| Stufe 3                      | Auslandsproduktion     | z.T. lokale Beschaffung  |
| Stufe 4                      | F&E im Ausland         | vorw. lokale Beschaffung |
| Stufe 5                      | Welt-Kompetenzzentren  | globale Beschaffung      |

Abb. 4-14: Internationalisierung der Wertschöpfungskette (Beispiel)

Nach dem Wasserfall-Modell werden die einzelnen Länder sukzessive erschlossen, zunächst werden dabei diejenigen Länder erschlossen, die dem Heimatmarkt am ähnlichsten sind, mit jeder weiteren Internationalisierungsstufe steigt dann der Fremdheitsgrad der Länder an. Also würde man aus einem der deutschsprachigen Länder zunächst die anderen erschließen, um danach weitere Nachbarländer einzubeziehen. Bei einem Schritt aus Europa hinaus würden dann zunächst Länder mit ähnlicher Kultur und/oder Wirtschaftsstruktur angegangen, bevor man versuchen würde, in sehr fremden Ländern Fuß zu fassen. Die einzelnen Länder werden erst nach sorgfältiger Informationsrecherche jeweils nacheinander bearbeitet (vergl. Abbildung 4-15).

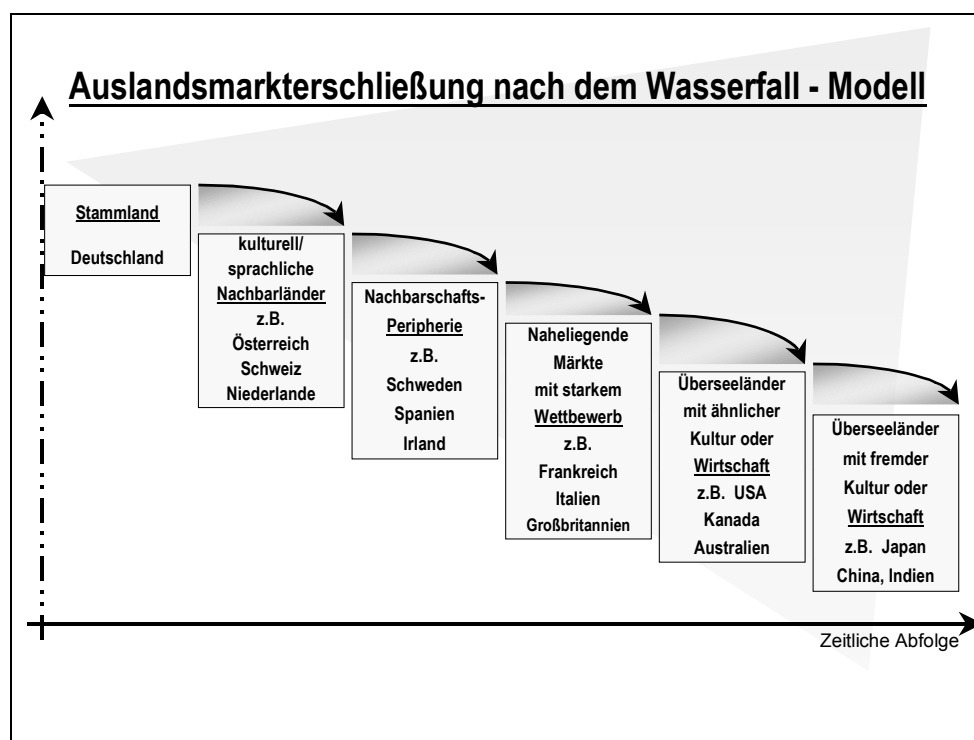

Abb. 4-15: Internationalisierung nach dem Wasserfall-Modell

Die beiden weiteren Methoden ähneln sich etwas. Es werden zunächst Gruppen von internationalen Märkten (z.B. nach Regionen) gebildet, die dann unter Ausnutzung von Synergien erschlossen werden. Beim Sprinkler-Modell wird in kurzer Zeit versucht (ggf. ausgehend von einem zentralen Ausgangsland), möglichst viele Auslandsmärkte gleichzeitig oder in kurzer Abfolge mit einem möglichst niedrigen Budget zu erschließen (vergl. Abbildung 4-16), um so Entwicklungs- und Anpassungskosten möglichst kurzfristig zu amortisieren (z.B. technische Produkte).

Bei dem Wassertropfen-Modell entscheidet sich ein Unternehmen, zunächst ein (zentrales/wichtiges) Land in einer Region zu erschließen, um erst danach das nächste und dann weitere Länder einzubeziehen. Die verschiedenen Regionen werden auf diese Weise i.d.R. ebenfalls erst nacheinander erschlossen. Entsprechend dieser Modelle lassen sich unternehmerische Internationalisierungsstrategien entwickeln, mit denen wir uns im Folgenden befassen.

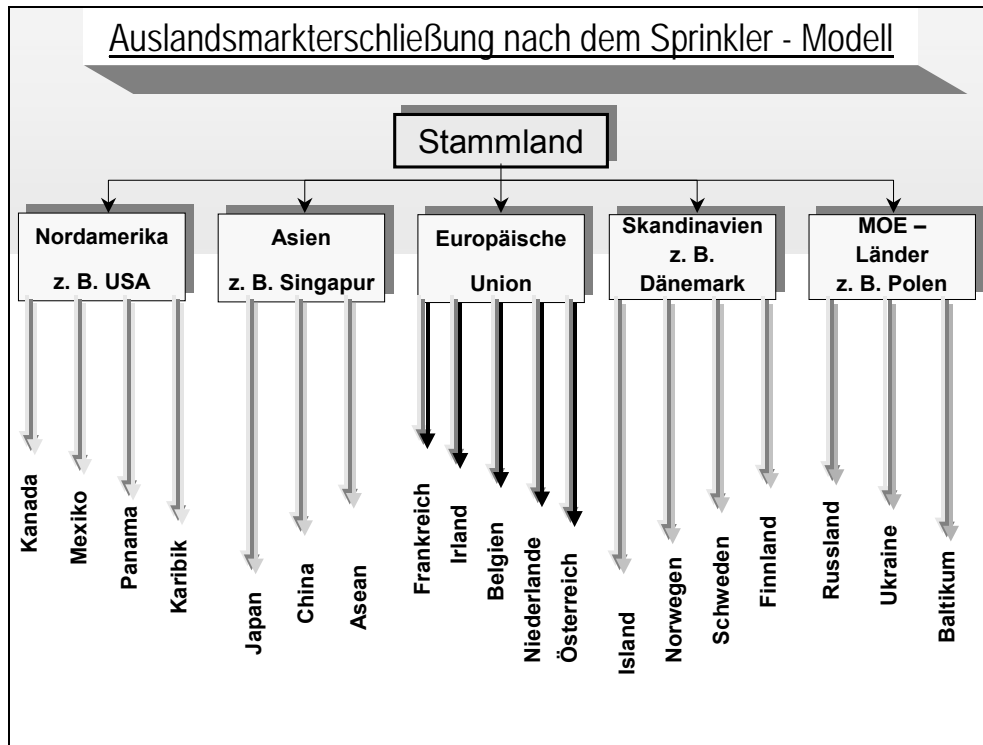

Abb. 4-16: Internationalisierung nach dem Sprinkler-Modell



## 4.5 Internationalisierungsstrategien

---

*In diesem Abschnitt lernen Sie*

- Kriterien internationaler Strategie,
- internationale, multi-nationale und globale Strategien
- Teilstrategien internationaler Strategien sowie
- mögliche Strategieprofile kennen.

---

Wie bereits dargelegt werden insbesondere zu Anfang einer Internationalisierung und vor allem in KMU häufig keine Internationalisierungsstrategien entwickelt. Meist werden erst zu einem späteren Zeitpunkt solche Strategien erarbeitet bzw. um die bisherigen internationalen Aktivitäten herum „gestrickt“. Sehr kreativ werden bisherige Aktivitäten in eine Strategie eingebettet, selten allerdings wird auch die Konsequenz einer Trennung von Auslandsaktivitäten oder deren Veränderung gezogen.

Die strategischen Kernfragen betreffen insbesondere die Auswahl der Zielländer/-regionen mit konkreten Standorten, die Form des Markteintritts, das Vorgehen bei der Markterschließung sowie die generelle Marktstrategie (market seeking). Die Durchdringung internationaler Absatzmärkte ist das Hauptmotiv zu grenzüberschreitender unternehmerischer Tätigkeit (vergl. auch Koopmann, Georg/ Franzmeyer, Fritz, S. 19).

Als klassisches Investitionsmotiv internationaler Unternehmen gilt die Erschließung und Sicherung der Rohstoffversorgung (resource-seeking). Wenngleich dieses Motiv angesichts eines Global Sourcing und der Möglichkeiten eines E-Procurement etwas in den Hintergrund tritt, können bestimmte Marktgegebenheiten oder Handelshemmnisse auch weiterhin Veranlassung für strategische Beschaffungssicherung sein.

Kostensenkung ist zunehmend das Ziel internationalen Managements (efficiency seeking). Die gesamte Bandbreite der Standortfaktoren ist entscheidender Auslöser für geplante und umgesetzte Effizienzstrategien der Unternehmen, die dann ggf. zu spezialisierten Fertigungen in verschiedenen Gastländern führen. Produktionen, Montagen oder andere Unternehmensfunktionen arbeiten am jeweils günstigsten Standort für den gesamten (Welt-)Markt.

Zunehmend wichtiger werden auch Wertstrategien (asset seeking), deren Ziel die Nutzung internationaler strategischer Ressourcen ist. Dabei geht es im Wesentlichen um den Zugang zu internationalen und gelegentlich lokal gebundenen Wissensquellen (knowledge seeking), z.B. durch Netzerkennungen in Form von Kooperationen, Joint Ventures etc.

Im Zusammenhang mit diesen Internationalisierungsstrategien spielen dann noch Art und Umfang des Kapitalengagements (Eigentumsform) und der Steuerungsmöglichkeit sowie die Verfügbarkeit von Produktions- und Humanressourcen eine bedeutende strategische Rolle. Die letztgenannten Bereiche sind neben weiteren wichtige unternehmensinterne Kriterien.

Unternehmensexterne Kriterien aus der Umwelt, nämlich Kunden, Wettbewerber, die ökonomischen, kulturellen und politischen Gegebenheiten in den interessierenden Ländern, spielen bei der Auswahl internationaler Strategien ebenso eine wichtige Rolle. Letztendlich ist zu prüfen, ob die Auslandsstrategien untereinander und mit der nationalen Strategie übereinstimmen, ob es Synergien oder Dissonanzen gibt. Es ist sinnvoll, eine internationale Strategie zu formulieren, die allen Kriterien Rechnung trägt.

Im Rahmen einer Internationalisierungsstrategie sind Art und Umfang des Auslandsengagements festzulegen, möglicherweise auch in einer Abfolge entsprechend dem aktuellen Internationalisierungsgrad. Es gibt vier allseits anerkannte Ansätze (vergl. Abbildung 4-17) von Internationalisierungsstrategien und zwar folgende:

1. ethnozentrisch (Heimatland-orientiert)
2. polyzentrisch (Gastland-orientiert)
3. geozentrisch (Welt-orientiert)
4. regionalistisch/synergetisch/transnational (Regionen-orientiert)

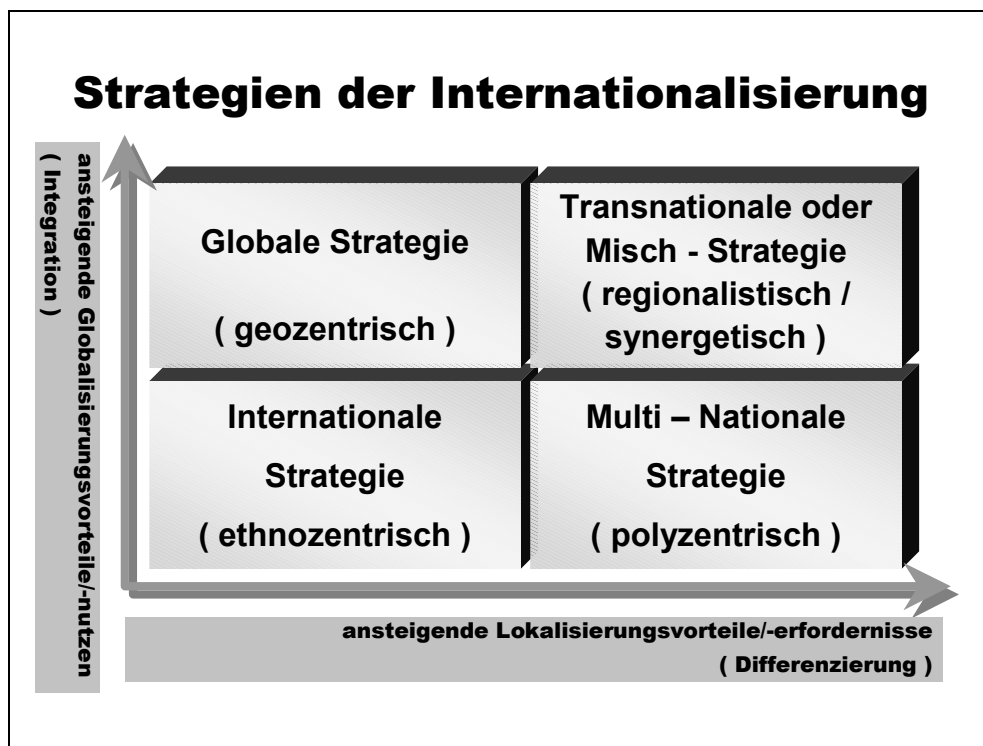

Abb. 4-17: Internationalisierungsstrategien

Der ethnozentrische Ansatz orientiert sich an den Gegebenheiten auf dem Heimatmarkt und versucht erfolgreiche Produkte, Leistungen oder Konzepte des Heimatlandes auf die internationalen Märkte zu übertragen. Dabei besteht keine besonders hohe Notwendigkeit zur Integration, um evt. Größenvorteile aus einem erweiterten Markt zu realisieren, dennoch ist eine Standardisierung in gewissem Umfang wünschenswert. Diese Strategie, die nur wenig Lokalisierungs- bzw. Differenzierungserfordernisse mit sich bringt, wird auch als Internationale Strategie bezeichnet (vergl. Abbildung 4-17). Eine solche Strategie wählen die meisten Unternehmen zumindest in der Anfangsphase ihrer Internationalisierungsbemühungen.

Der polyzentrische Ansatz (vergl. Abbildung 4-17) richtet sich an den Bedürfnissen und Besonderheiten der einzelnen Ländermärkte aus, d.h. es erfolgt eine starke Anpassung an die jeweiligen nationalen Ansprüche. Die Lokalisierungserfordernisse machen eine starke Differenzierung im Engagement oder bei den Leistungen notwendig, so dass keine oder kaum Größenvorteile aus dem internationalen Engagement zu ziehen sind. Zumindest bei europäischen Unternehmen findet sich eine solche Strategie meist als Nachfolgestrategie zur internationalen Strategie.

Beim geozentrischen Ansatz gibt es für das Unternehmen nur einen Markt, den Weltmarkt, eine Integration aller Unternehmensaktivitäten in ein Gesamtsystem steht dort im Vordergrund. Entsprechend der Theorie der Economies of Scale wird versucht, im Sinne einer Kostenführerschaft Größenvorteile durch einen großen Absatzmarkt zu realisieren. Also besteht die Notwendigkeit möglichst viele Märkte zu erschließen und dort möglichst große Marktanteile zu erreichen (vergl. Abbildung 4-17). Diese Strategie schlagen japanische und nordamerikanische Unternehmen oftmals als zweite Strategievariante ein, europäische meist erst in einer dritten Internationalisierungsstufe.

In einer letzten Stufe der Internationalisierung kommen viele Unternehmen zu der Erkenntnis, dass ein regionalistischer bzw. synergetischer Ansatz meist der beste ist. Bei der Transnationalen oder Misch-Strategie (vergl. Abbildung 4-17) wird der Erkenntnis Rechnung getragen, dass es für die meisten Produkte und Dienstleistungen keinen wirklich einheitlichen Weltmarkt gibt, eine Globalisierung der Unternehmensaktivitäten daher auch nicht ganz erfolgreich ist. Es gibt nationale Unterschiede hinsichtlich Kultur, Werten, Wirtschaftssystemen etc., die eine nationale oder oftmals regionale (im Sinne von Weltregionen) Differenzierung in einem gewissen Umfang notwendig machen. Soviel Integration wie möglich und soviel Differenzierung wie nötig ist der Kern dieser Misch-Strategie. Der Weltmarkt wird dabei in gleichartig zu bearbeitende Regionen gegliedert, die dann auch gleich(-artig) bearbeitet werden (z.B. Sprinkler-Methode, vergl. Abbildung 4-16).

Ein weiterer Ansatz sieht die internationalen Unternehmensstrategien zusammen gesetzt aus einem Bündel von Teilstrategien (siehe auch Macharzina/Oesterle S. 275 ff), wie dies z.B. folgende sein könnten:

- der Umfang der Weltmarkterschließung/-erfassung
- die Allokation der internationalen Märkte

- das Timing der internationalen Marktbearbeitung
- die Art der Marktbearbeitungsinstrumentarien und
- die Formen des internationalen Markteintritts.

Aus den jeweiligen Teilstrategien können die für das Unternehmen, seine spezifische Situation und seine Produkte/Leistungen jeweils besten ausgewählt und zu einer Gesamtstrategie zusammen gesetzt werden , es entsteht damit quasi ein Strategieprofil.

Im Rahmen einer Entscheidung über die Weltmarkterfassung wird der Umfang der internationalen Aktivitäten festgelegt. Die Alternativen sind geringe, mittlere oder breite Weltmarkterschließung. Zum zweiten muss dann über die Zielländer/-regionen entschieden werden, in denen das Unternehmen internationale Aktivitäten entfalten will. Die Allokationsentscheidung kann also festlegen, ob nur die Nachbarländer, alle EU-Länder, alle europäischen oder kulturell ähnlichen Länder, die Triade-Länder, alle entwickelten Länder oder möglichst alle Länder mit einer bestimmten Kaufkraft o.ä. erschlossen werden (zur Marktauswahl vergl. Kapitel 7).

Das Timing der internationalen Marktbearbeitung umfasst Festlegungen hinsichtlich des Eintritts, der systematischen Bearbeitung und ggf. des Austritts aus den Märkten. Es ist eine Entscheidung zu treffen, ob in verschiedene Märkte gleichzeitig eingetreten werden soll (z.B. Sprinkler-Modell) oder diese eher nacheinander (z.B. Wasserfall-Modell, vergl. Abbildung 4-15) erschlossen werden sollen. Dabei sind auch Zeiträume für den Erschließungsgrad und ggf. Kriterien zum Austritt aus Märkten festzulegen.

Mit den Marktbearbeitungsinstrumenten werden Entscheidungen über Integration bzw. Standardisierung, Adaption oder Differenzierung der Marktbearbeitung getroffen. Bei den Formen der Marktbearbeitung geht es dann um die konkreten Geschäftssysteme, die zur Erfassung der internationalen Märkte ausgewählt werden, z.B. (in)direkter Export, Import, Lizenzen, Netzwerke, Allianzen, Niederlassungen, Joint-Ventures, internationale Produktionen etc. Ein mögliches Spektrum der Internationalisierungsformen von Unternehmen ist in Abbildung 4-10 dargestellt. Die einzelnen Geschäftssysteme werden in Kapitel 5 näher dargestellt.

Aus diesen fünf Teilstrategien lässt sich nun unternehmensspezifisch eine internationale Gesamtstrategie mit einem individuellen Profil entwickeln. Als Beispiele sollen folgende Strategieprofile dienen:

| Teilstrategien                   | Gewählte Strategiealternativen               |
|----------------------------------|----------------------------------------------|
| Umfang der Weltmarkterschließung | Mittlere Weltmarkterfassung                  |
| Allokation der Märkte            | Europa und Triade-Länder                     |
| Timing der Marktbearbeitung      | Zeitgleiche Marktbearbeitung                 |
| Marktbearbeitungsinstrumentarien | Standardisierung/Integration                 |
| Marktbearbeitungsformen          | Franchising, Niederlassungen, Joint-Ventures |

| Teilstrategien                   | Gewählte Strategiealternativen                                     |
|----------------------------------|--------------------------------------------------------------------|
| Umfang der Weltmarkterschließung | Breite Weltmarkterfassung                                          |
| Allokation der Märkte            | Entwickelte und Schwellenländer                                    |
| Timing der Marktbearbeitung      | Zeitverschobene Marktbearbeitung                                   |
| Marktbearbeitungsinstrumentarien | Partielle Adaption oder Differenzierung                            |
| Marktbearbeitungsformen          | Export, E-Commerce, Kooperationen/Allianzen, Tochtergesellschaften |

Abb. 4-18: Beispielprofile von Internationalisierungsstrategien

| <i>Begriffe zum Nachlesen</i> |                   |                             |
|-------------------------------|-------------------|-----------------------------|
| Risikodiversifikation         | EWU               | kulturelle Distanz          |
| Hermes                        | GTZ               | Doppelbesteuerung           |
| KfW                           | DEG               | AUMA                        |
| CMA                           | Incoterms         | Eigentumsgarantien          |
| Akkreditiv                    | Wechselkursrisiko | Ressource-Seeking           |
| Efficiency-Seeking            | Asset-Seeking     | Internationalisierungszwang |

---

**Wiederholungsfragen**

---

1. Nennen Sie mindestens fünf Internationalisierungsmotive von Unternehmen.
2. Was ist der Unterschied zwischen proaktiven und reaktiven Internationalisierungsmotiven?
3. Was ist der Unterschied zwischen internen und externen Internationalisierungsmotiven?
4. Geben Sie Beispiele staatlicher Exportförderungen.
5. Geben Sie Beispiele internationaler staatlicher Ansiedlungsförderungen.
6. Welche Mindestvoraussetzungen müssen in kleinen Unternehmen gegeben sein, damit es internationalisierungsfähig ist?
7. Welchen Herausforderungen im Gastland muss sich ein Unternehmen im Rahmen der Internationalisierung stellen?
8. Nennen sie Beispiele für internationale Organisationsstrukturen der Unternehmen.
9. Welche Währungsrisiken bestehen im Auslandsgeschäft und wie lassen sie sich vermeiden?
10. Stellen Sie die Unterschiede einer Internationalisierung nach dem Wasserfall-, dem Sprinkler und dem Wassertropfen-Modell dar.
11. Was bedeuten die Bereiche Market-Seeking, Ressource-Seeking, Efficiency-seeking und Asset-Seeking für die internationalen Strategien?
12. Wie unterscheiden sich internationale, multi-nationale, globale und transnationale Strategien?
13. Geben sie ein Beispiel für eine Internationalisierungsstrategie mit Teilstrategien (Strategieprofil).

---

**Literaturhinweise**

---

*Albaum, Gerald/Strandskov, Jesper/Duerr, Edwin:* Internationales Marketing und Exportmanagement, München 2001

*Backhaus, Klaus/Büschken, Joachim/Voeth, Markus:* Internationales Marketing, 3. Auflage Stuttgart 2000.

*Breuer, Wolfgang/Gürtler, Marc:* Internationales Management, Wiesbaden 2003

*Dülfer, Eberhard:* Internationales Management in unterschiedlichen Kulturbereichen, München 1999

*Gutmann, Joachim/Kabst, Rüdiger:* Internationalisierung im Mittelstand, Wiesbaden 2000

*Koopmann, Georg/Franzmeyer, Fritz:* Weltwirtschaft und internationale Arbeitsteilung in: Bundeszentrale für Politische Bildung (Hrsg.): Globalisierung, Informationen zur politischen Bildung 280, S. 12-26, Bonn 2003

*Kotler, Philip/Bliemel, Friedhelm:* Marketing-Management, Stuttgart, 9. Aufl., 1999

*Macharzina, Klaus/Oesterle, Michael-Jörg:* Handbuch Internationales Management, Wiesbaden 1997

*Perlitz, Manfred:* In Kooperation internationale Märkte erobern, in: absatzwirtschaft 1/2004, Düsseldorf

## 8. Erfolgsfaktor Marketing und Kundenorientierung

*In diesem Abschnitt lernen Sie*

- die wachsende Bedeutung einer Kundenorientierung,
- die wachsende Bedeutung eines Multi-Kanal-Marketing sowie
- die Erweiterung der Marketinginstrumente kennen.

In Abschnitt 2.2 wurde bereits auf die Bedeutung der Kundenorientierung hingewiesen. Die Erkenntnis, dass die Wünsche und Bedürfnisse des Kunden der Ausgangspunkt für jegliches Angebot eines Unternehmens und damit für die gesamte Unternehmenstätigkeit sind, hat sich in deutschen Unternehmen erst in den letzten Jahren durchgesetzt. Sie ist in der heutigen Zeit allerdings notwendige Basis für eine erfolgreiche Unternehmenspolitik, die auf Kundenzufriedenheit und Kundenbindung abzielt. Dies gilt nicht nur für Aktivitäten in entwickelten Volkswirtschaften, sondern zunehmend auch für die in Schwellen- und Entwicklungsländern.

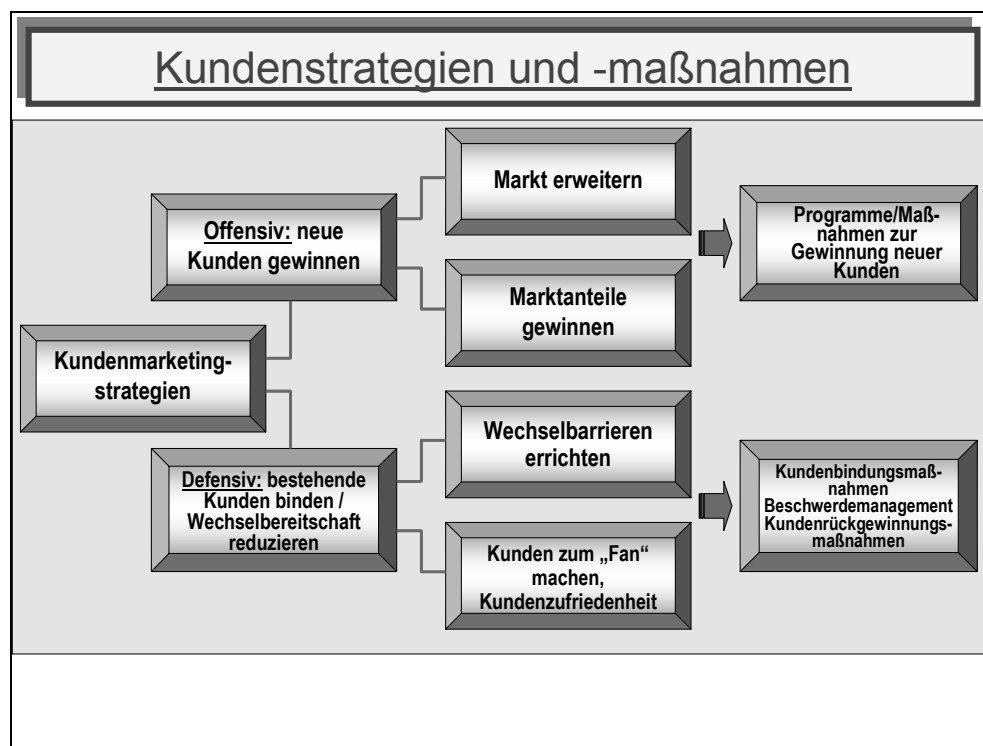

Abb. 8-1: Kundenstrategien managen (nach Kotler/Bliemel, S. 72)

An Stelle einer relativ teuren (je nach Branche fünf bis sieben Mal teurer) und oft



aufwändigeren Neukundengewinnung (offensive Strategie) tritt vorrangig ein Kundenbindungsmanagement (defensive Strategie) in den Unternehmensfokus, denn je länger eine Kundenbindung dauert, desto profitabler wird sie (vergl. Abbildung 8-1). Im Sinne einer wirklich erfolgreichen Kundenorientierung bedeutet dies, vorrangig die Kundenzufriedenheit zu erhöhen und nicht (ausschließlich) Hürden gegen einen Wechsel der Kunden zu errichten (Vertragsdauer, Gewährleistung, Technologie, Rabatt- und Bonusprogramme); Beschwerdemanagement und Kundenrückgewinnungsprogramme runden ein Kundenbindungsmanagement ab.

Die Kundenzufriedenheit hängt eng mit der Qualität der Dienstleistungen bzw. Produkte zusammen. Dabei kommt es nicht auf eine irgendwie festgestellte objektive Qualität oder gar ein Total Quality Management (TQM) an, sondern darauf, was Kunden subjektiv als Qualität erwarten und empfinden (vergl. auch Kundenzufriedenheitsmessung in Abschnitt 7.2). Werden diese Erwartungen nicht erfüllt, wandern die unzufriedenen Kunden zur Konkurrenz ab; bei einer Beschwerde ist mit Hilfe eines positiven Beschwerdemanagements noch ein Halten des Kunden möglich (vergl. Abbildung 8-2).

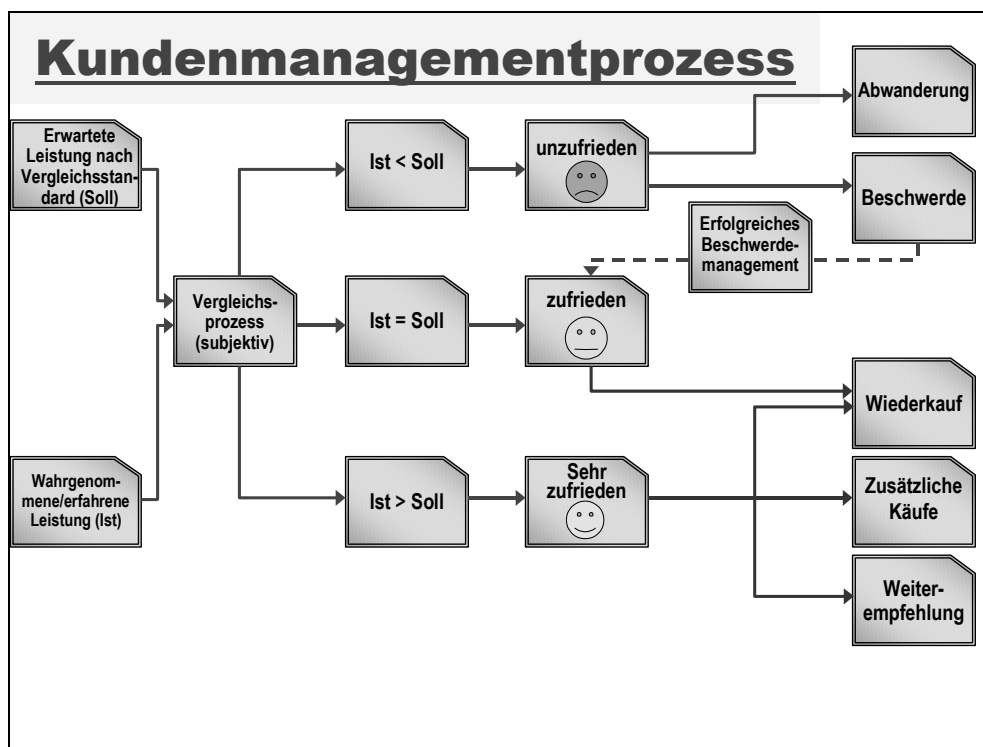

Abb. 8-2: Management und Wirkung der Kundenzufriedenheit

Wird den Kundenerwartungen entsprochen, stellt sich beim Kunden eine Zufrie-

denheit ein, die aber noch nicht gleichbedeutend mit einer dauerhaften Kundenbindung ist. Nur Kunden, deren Erwartungen übertroffen wurden, können dauerhaft an das Unternehmen gebunden werden (vergl. Abbildung 8-2). Weitere Aspekte zur Erreichung eines hohen Kundenzufriedenheitsgrades sind innovative Produkte, ein als günstig empfundenes Preis-Leistungsverhältnis und ein möglichst individueller Zusatznutzen, z.B. in Form von Kundenloyalitätsprogrammen, wie sie zunehmend Verbreitung finden (vergl. Wiesner a).

Zufriedene Kunden bringen dem Unternehmen durch zusätzliche und Mehrfachkäufe unmittelbar steigende Umsätze und Gewinne (der Kundenwert bzw. Lifetime Value steigt im Zeitablauf) und durch Weiterempfehlungen weitere Kunden. Auch die Preissensibilität der Stammkunden ist meist nicht mehr so stark ausgeprägt, so dass Unternehmen i.d.R. höhere Durchschnittspreise erzielen können (vergl. Abbildung 8-3). Also muss es Ziel eines jeden Unternehmens sein, zufriedene und loyale Kunden zu gewinnen. Die Treue und Loyalität der Kunden bezieht sich i.d.R. auf eine Marke, ein Unternehmen und/oder die Verkaufsstätte. Unterschiedliche Kundenbindungs-, Frequent-Shopper- oder Frequent-User-Programme, Rabatt- und Belohnungssysteme, Nachlass- und Loyalitätsprogramme sollen dabei helfen, die Kundenloyalität zu erhöhen.

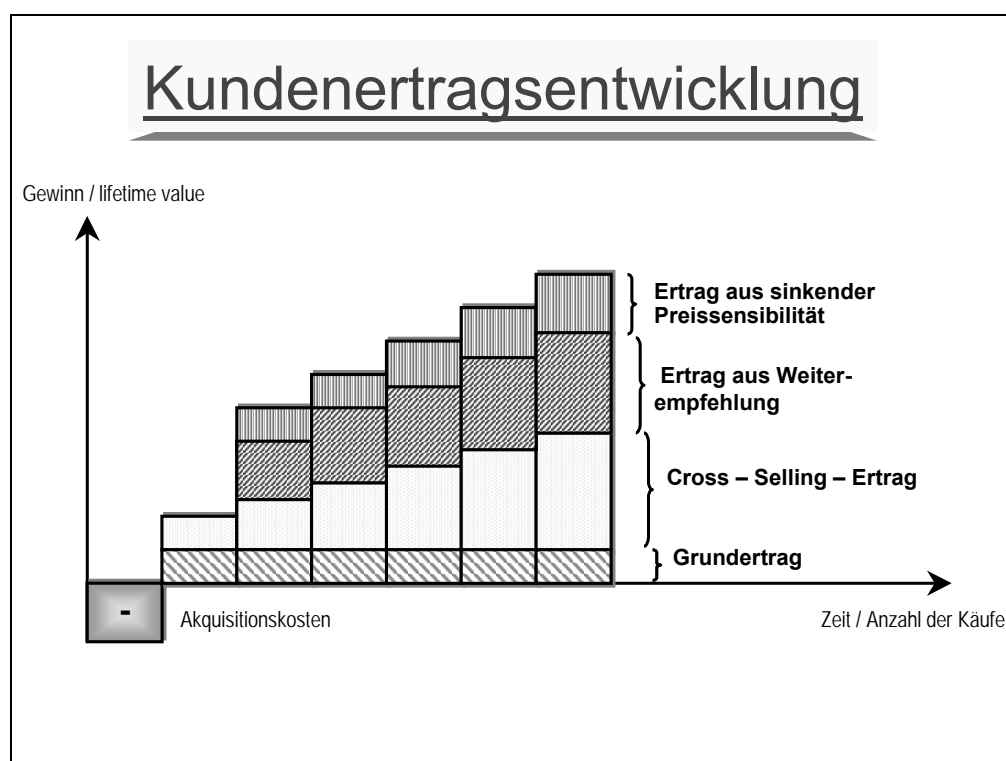

Abb. 8-3: Entwicklung des Kundenertrags bzw. -wertes im Zeitablauf

Im Rahmen der Kundenorientierung optimieren die meisten Unternehmen den Kundenbeziehungsprozess. Ein Kundenprozess lässt sich i.d.R. in vier Phasen gliedern, die Informationsphase, die Phase der Kaufentscheidung, die Abwicklungs- und Nutzungsphase. Mit besonderer Kundenkenntnis, kundenspezifischen Angeboten, operativer Abwicklungsexzellenz und überlegenem Service ist es einem Unternehmen möglich, während aller Phasen des Kundenprozesses positiv auf den Kunden einzuwirken. Die Phasen des Kundenprozesses lassen sich aus Unternehmenssicht auch etwas detaillierter als 10 Stufen beschreiben, die nacheinander erklimmen werden müssen (vergl. Abbildung 8-4).

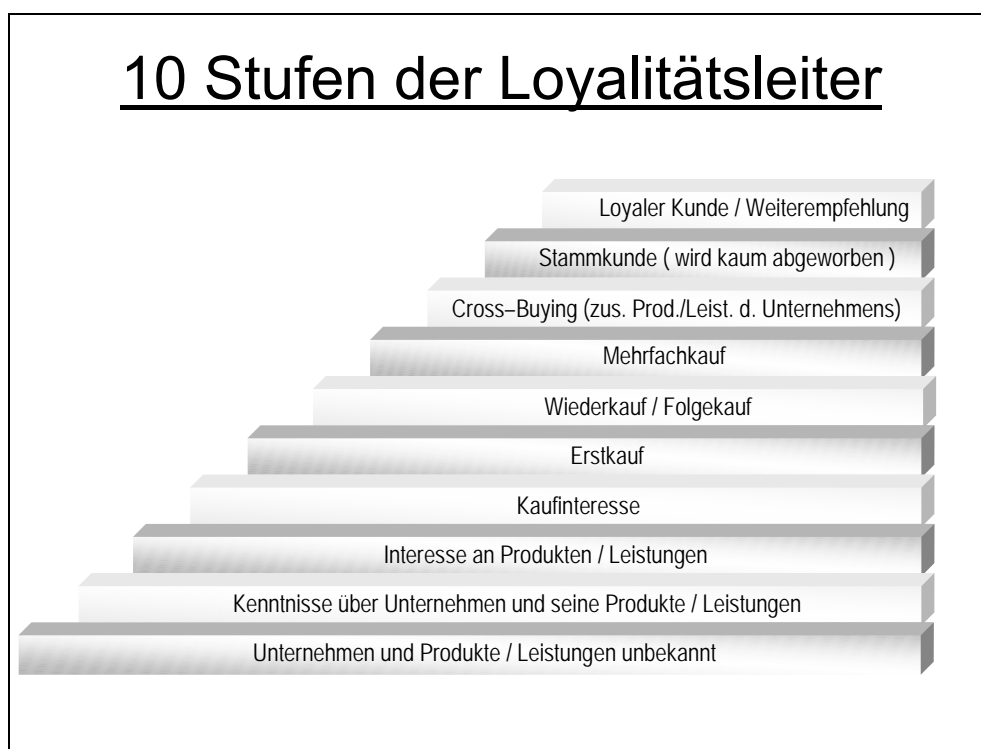

Abb. 8-4: Kundenphasen bei steigender Loyalität/Bindung

Diese Optimierung des Kundenprozesses führt zur Identifikation besonders profitabler Kunden mit dem Unternehmen bzw. seinen Produkten, zur Erhöhung der Umsätze und zu einer längeren Kundenbeziehung, letztendlich alles Faktoren die den Wert eines Kunden für jedes Unternehmen deutlich erhöhen. Sowohl beim Umsatz als auch beim Gewinn lässt sich eine unterschiedliche Bedeutung der Kunden für ein Unternehmen feststellen. Es gibt eine gebräuchliche Unterteilung in sog. A-, B- und C-Kunden, wobei mit den wichtigsten A-Kunden, obwohl sie oft

nur 20% bis 30% der Kundenanzahl umfassen, oftmals 70 % oder 80 % des Umsatzes erreicht werden. Beim Umsatz sind dann mit den weniger profitablen B- und C-Kunden immer noch Steigerungen zu erreichen, allerdings sieht es beim Gewinn ganz anders aus. Die A-Kunden sind meist für mehr als 80 % des Gewinns, manchmal sogar noch mehr verantwortlich. B-Kunden steigern den Gewinn weiter (nicht selten auf über 100%) und C-Kunden reduzieren häufig den Gewinn (vergl. Beispiel in Abbildung 8-5).

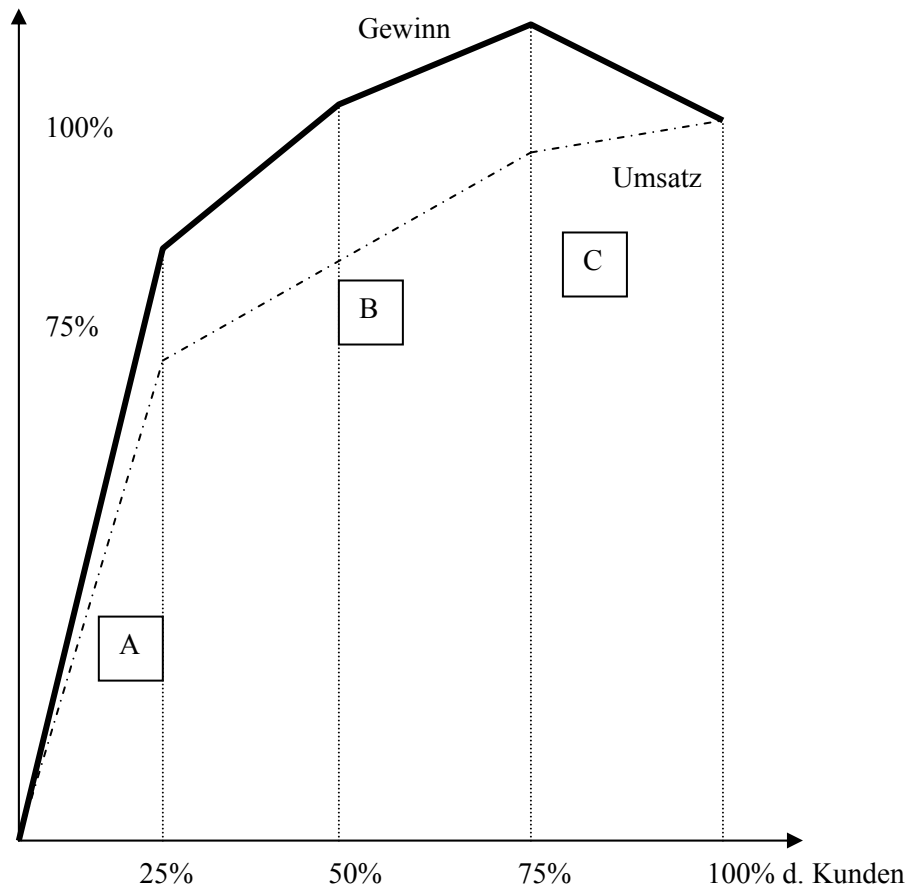

Abb. 8-5: Zusammenhang von Kundenanzahl/-typen und Gewinn/Umsatz

Der Zusammenhang zwischen Zufriedenheit und Loyalität eines Kunden lässt sich bislang noch nicht eindeutig erklären. Sicher ist, dass es einen positiven Zusammenhang gibt; ob dieser linear, progressiv, degressiv oder phasenweise unterschiedlich ist, ist bisher nicht eindeutig belegbar. Wahrscheinlich kommt aber die erste, sattelförmige Kurve in Abbildung 8-6 dem tatsächlichen Zusammenhang recht nahe.

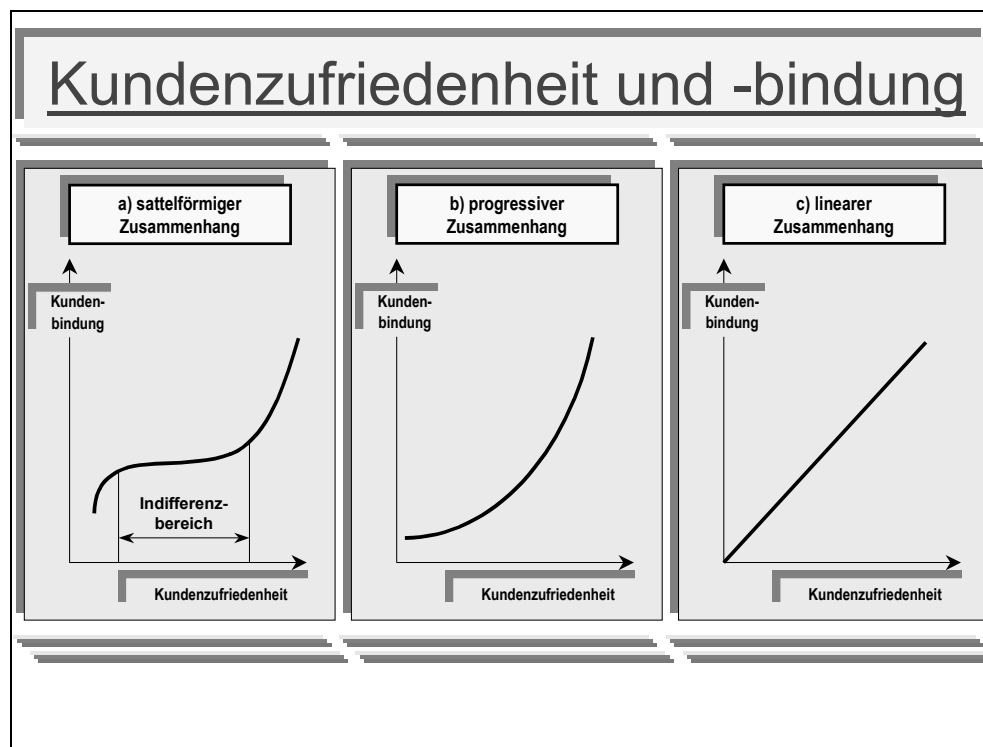

Abb. 8-6: Zusammenhang von Kundenzufriedenheit und Kundenbindung

Für ein Unternehmen ist es wichtig, verschiedene Vertrauensbildungsebenen im Kundendialog zu erreichen. Zunächst gilt es, die durchgängige Präsenz auf allen Kanälen und über alle Kontaktpunkte zum Kunden in einheitlicher Erscheinung (Multikanal-Marketing) sicher zu stellen, damit die Bekanntheit des Unternehmens oder der Marke beim Kunden entsprechend hoch ist und sich verfestigt. Die nächste Vertrauensebene ist die der operativen Exzellenz; dort kommt es auf die Kompetenz des Unternehmens, ausgedrückt in guter Leistung, angemessenen Preisen und Bequemlichkeit/Convenience für den Kunden an. Allerdings sind die Ansprüche der Kunden in den verschiedenen Weltregionen sehr unterschiedlich.

Um auch die letzte Vertrauensebene, nämlich die der emotionalen Ansprache und des wahren Vertrauens (vergl. Abbildung 8-7), zu erreichen, ist es sinnvoll über möglichst persönliche Kundenbeziehungen zu verfügen. Es sollte beim Kauf eine emotionale Erlebniswelt aufgebaut werden, um so eine Identität der Marke des Unternehmens und eine Identifikation des Verbrauchers mit dieser Identität zu erreichen. Allerdings werden sich auch hier sehr unterschiedliche regionale Anforderungen an ein international tätiges Unternehmen ergeben.

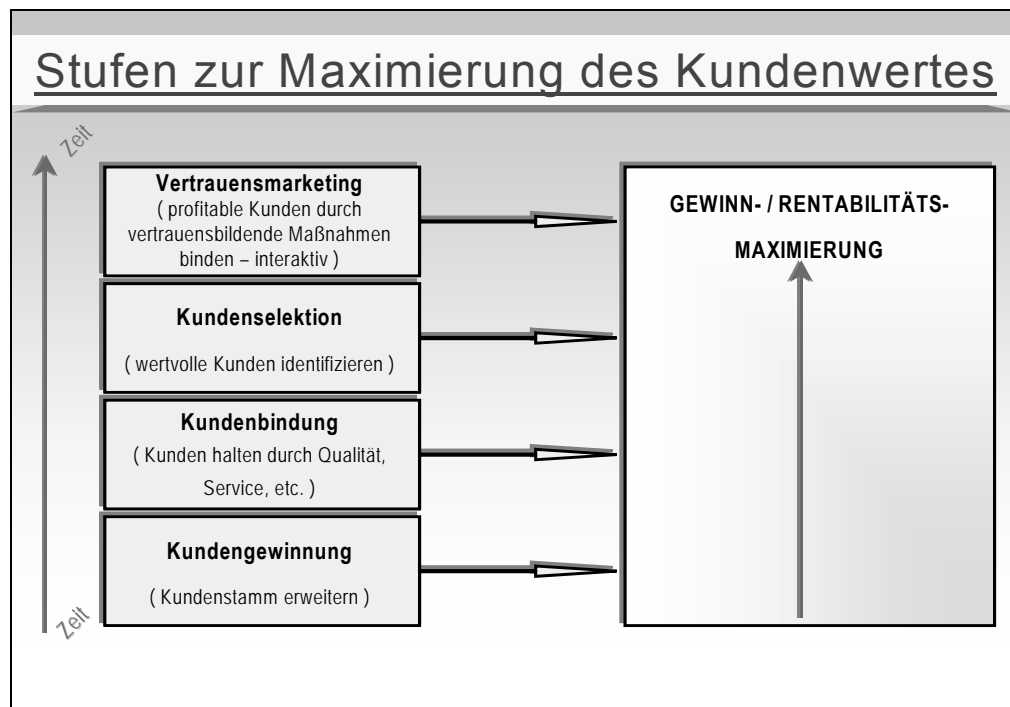

Abb. 8-7: Kundenwertsteigerungsmaßnahmen

Zur Erreichung einer Kundenbindung gibt es verschiedene Ansätze, die je nach Weltregion sehr unterschiedlich erfolgreich sein können. In früheren Zeiten wurden z.B. in westlichen Staaten eher Wechselhürden aufgebaut, um Kunden an einem leichten Wechsel zu einem anderen Anbieter zu hindern (diese Strategie findet sich heute oft noch in anderen Regionen). Hierbei gab es die Varianten einer technisch-funktionalen Bindung, einer vertraglichen Bindung oder einer ökonomischen Bindung (mit hohen Wechselkosten). Als erfolgreicher hat sich inzwischen die emotionale Kundenbindung erwiesen, die den Kunden quasi zum „Fan“ eines Unternehmens oder seiner Produkte/Leistungen macht (vergl. Abbildung 8-8), gelegentlich finden sich Vermischungen dieser Strategien, wie z.B. bei Kundenkarten, die häufig sowohl emotional als auch ökonomisch binden.

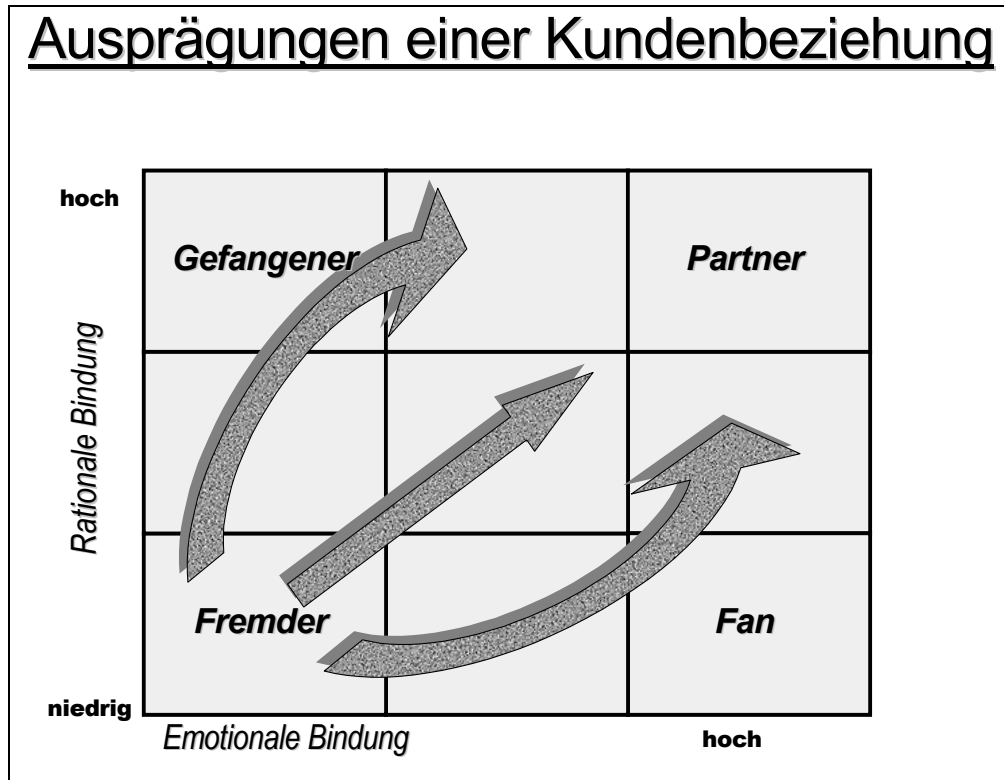

Abb. 8-8: Arten der Kundenbindung

Um Kunden zu gewinnen und diese möglichst langfristig an ein Unternehmen zu binden, steht den Unternehmen eine große Bandbreite von Marketinginstrumenten zur Verfügung, die sich in bestimmten Klassen zusammenfassen lassen. Klassisch unterscheidet man bei den Instrumenten die sog. „4 P“, nämlich die Produkt-, die Preis-, die Distributions- und die Kommunikationspolitik. Der Bedeutungsanstieg der Dienstleistungen und die neuen technischen Entwicklungen, wie das Internet oder die Mobilkommunikation, lassen aber eine Erweiterung auf 8 Instrumentalbereiche, die sog. „8 P“, als sinnvoll erscheinen (vergl. Abbildung 8-9). Zusätzlich gibt es nun die Instrumentalbereiche Personalpolitik, Prozessqualität, physisches Erscheinungsbild und öffentliche Meinung, die hier näher vorgestellt werden.

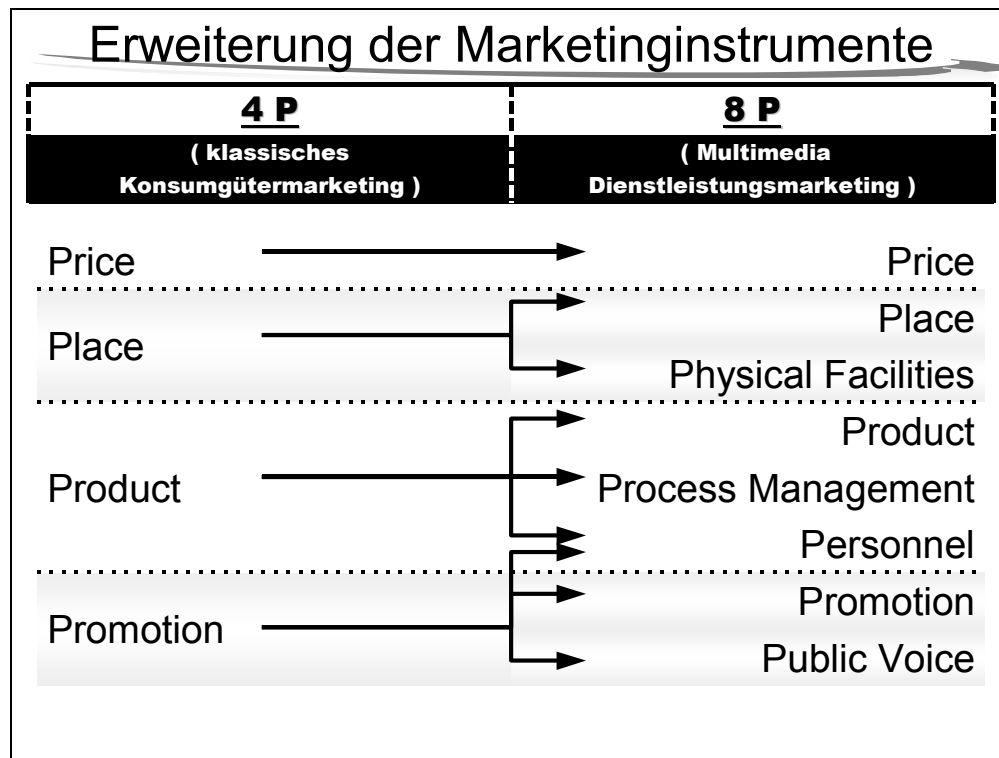

Abb. 8-9: Gruppen der Marketinginstrumente
